# Supplementary material
Source: bioRxiv or medRxiv preprint supplement (https://www.biorxiv.org/content/biorxiv/early/2022/03/20/2022.03.18.484896.1/DC1/embed/media-1.pdf)
Supplement: Supplementary file [file media-1.pdf]

# Supplementary information: Informative and adaptive distances and summary statistics in sequential approximate Bayesian computation

Yannik Schälte<sup>1,2,3</sup> and Jan Hasenauer<sup>1,2,3,\*</sup>

<sup>1</sup> Institute of Computational Biology, Helmholtz Zentrum München, 85764 Neuherberg, Germany

<sup>2</sup> Center for Mathematics, Technische Universität München, 85748 Garching, Germany

<sup>3</sup> Faculty of Mathematics and Natural Sciences, Rheinische Friedrich-Wilhelms-Universität Bonn, 53115 Bonn, Germany

\* To whom correspondence should be addressed (jan.hasenauer@uni-bonn.de)

## 1 Optimal summary statistics to recover distribution features

**Theorem 1.** *Denote the joint distribution of parameters and data  $\Theta, Y \sim \pi(\theta, y)$ , with prior marginal  $\pi(\theta) = \int \pi(\theta, y) dy$ , likelihood  $\pi(y|\theta) = \pi(\theta, y)/\pi(\theta)$ , and posterior  $\pi(\theta|y) = \pi(\theta, y)/\pi(y) = \pi(y|\theta)\pi(\theta)/\pi(y)$ . Given a parameter transformation  $\lambda : \mathbb{R}^{n_\theta} \rightarrow \mathbb{R}^{n_\lambda}$  such that  $\mathbb{E}_{\pi(\theta)}[|\lambda(\theta)|] < \infty$ , define summary statistics as the conditional expectation*

$$s(y) := \mathbb{E}[\lambda(\Theta)|Y = y] = \int \lambda(\theta)\pi(\theta|y) d\theta.$$

*Given observed data  $y_{obs}$ , acceptance threshold  $\varepsilon$ , and assuming the distance metric  $d(s(y), s(y_{obs})) = \|s(y) - s(y_{obs})\|$  is norm-induced, denote the ABC posterior distribution*

$$\pi_{\text{ABC},\varepsilon}(\theta|s(y_{obs})) \propto \int I[\|s(y) - s(y_{obs})\| \leq \varepsilon] \pi(y|\theta) dy \cdot \pi(\theta).$$

*Then, it holds*

$$\|\mathbb{E}_{\pi_{\text{ABC},\varepsilon}}[\lambda(\Theta)|s(y_{obs})] - s(y_{obs})\| \leq \varepsilon, \tag{1}$$

*and therefore*

$$\lim_{\varepsilon \rightarrow 0} \mathbb{E}_{\pi_{\text{ABC},\varepsilon}}[\lambda(\Theta)|s(y_{obs})] = \mathbb{E}[\lambda(\Theta)|Y = y_{obs}]. \tag{2}$$

*Proof.* Based on Fearnhead and Prangle [2012] and Jiang et al. [2017], a simple extension of the argumentation in the latter. Note that  $s(y)$  is almost surely finite due to  $\mathbb{E}[|\lambda(\theta)|] < \infty$  and Fubini's Theorem. As for the induced  $\sigma$ -algebras holds  $\sigma(s(Y)) \subset \sigma(Y)$ ,  $s(Y)$  is also a version of the conditional expectation  $\mathbb{E}[\lambda(\Theta)|s(Y)]$ , since

$$s(Y) = \mathbb{E}[s(Y)|s(Y)] = \mathbb{E}[\mathbb{E}[\lambda(\Theta)|Y]|s(Y)] = \mathbb{E}[\lambda(\Theta)|s(Y)]$$

by, respectively, measurability, definition, and tower property. Thus, denoting the acceptance region

$$A = \{\|s(Y) - s(y_{\text{obs}})\| \leq \varepsilon\} \in \sigma(s(Y)),$$

with  $\mathbb{E}[\lambda(\Theta)|A] = \mathbb{E}[\lambda(\Theta)\mathbb{1}_A]/\mathbb{E}[\mathbb{1}_A]$ , we have

$$\mathbb{E}_{\text{ABC},\varepsilon}[\lambda(\Theta)|s(y_{\text{obs}})] = \mathbb{E}[\lambda(\Theta)|A] = \mathbb{E}[s(Y)|A],$$

such that by Jensen's inequality, given convexity of the norm,

$$\|\mathbb{E}_{\pi_{\text{ABC},\varepsilon}}[\lambda(\Theta)|y_{\text{obs}}] - s(y_{\text{obs}})\| = \|\mathbb{E}[s(Y) - s(y_{\text{obs}})|A]\| \leq \mathbb{E}[\|s(Y) - s(y_{\text{obs}})\| |A] \leq \varepsilon.$$

(2) then follows directly from (1) by definition of  $s(y_{\text{obs}})$ . □

Therefore, e.g. for  $\lambda(\theta) = (\theta^1, \dots, \theta^k)$ , the corresponding first  $k$  moments of the true posterior distribution are recovered by an ABC analysis employing the posterior expectation  $s(y) = \mathbb{E}[\lambda(\Theta)|Y = y]$  as summary statistic, for  $\varepsilon \rightarrow 0$ . For  $k \rightarrow \infty$ ,  $\varepsilon \rightarrow 0$ , and e.g. assuming existence of moment-generating functions, the approximate posterior converges to the true posterior.

## 2 Effective sample sizes

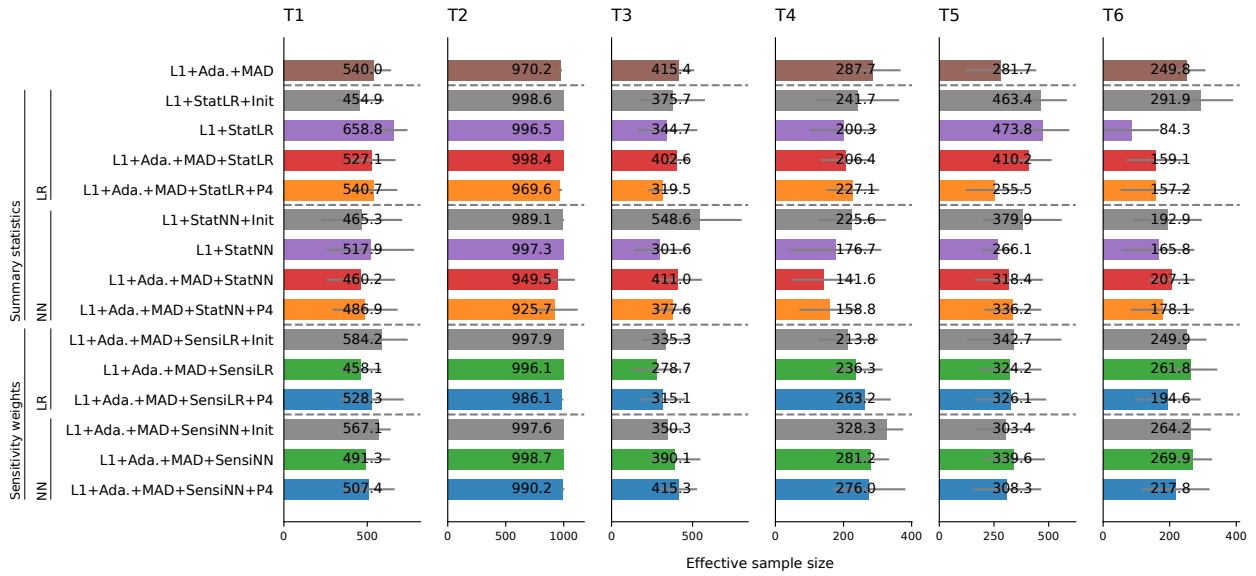

Figure S1: Effective sample sizes (ESS) for models T1-6. Given particles  $P_{n_t} = \{(\theta_i, w_i)\}_i$  accepted in the last generation, the ESS is defined as  $ESS = (\sum_i w_i)^2 / \sum_i w_i^2$  [Martino et al., 2017]. Shown are means and standard deviations (grey error bars) over all performed runs.

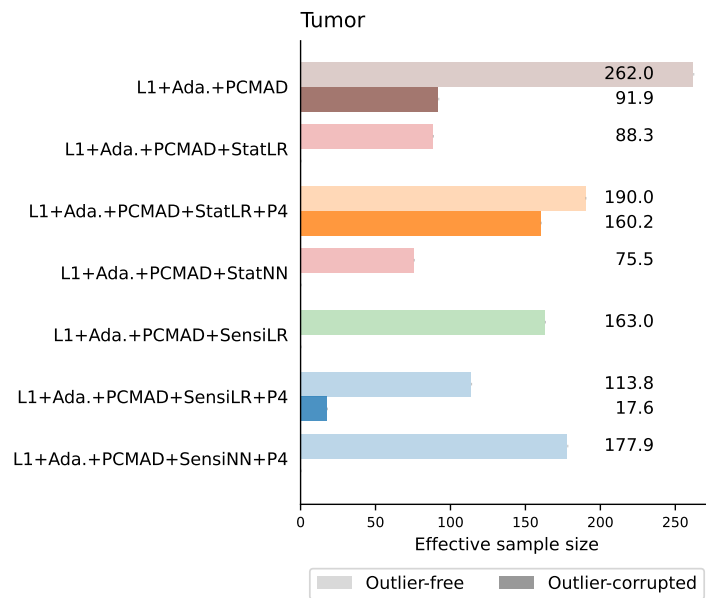

Figure S2: Effective sample sizes (ESS) for the tumor model, on outlier-free (light bars) and outlier-corrupted (dark bars) data, for selected settings. Note that on outlier-corrupted data, only three settings were run.

## References

- Fearnhead, P. and Prangle, D. Constructing summary statistics for approximate Bayesian computation: semi-automatic approximate Bayesian computation. *J. R. Stat. Soc. B*, 74(3):419–474, 2012.
- Jiang, B. et al. Learning summary statistic for approximate bayesian computation via deep neural network. *Statistica Sinica*, pages 1595–1618, 2017.
- Martino, L. et al. Effective sample size for importance sampling based on discrepancy measures. *Signal Processing*, 131:386–401, 2017.
